# Supplementary material
Source: MDPI journal article supplement (https://www.mdpi.com/search?q=crystals-09-00477)
Supplement: s001 [file crystals-09-00477-s001.pdf]

# Supporting Information

## Two Tetranuclear Butterfly Shaped Co(II) Complexes: Structure, Mass Spectrometric, and Magnetism

Qian-Jun Deng,<sup>\*,1</sup> Min Chen,<sup>1</sup> Dong-Chu Chen,<sup>\*,1</sup> Chang-Ai Chen<sup>1</sup>

<sup>1</sup>School of Material Science and Energy Engineering, Foshan University, Foshan 528000, Guangdong, People's Republic of China

| Supporting Tables  |                                                                                                                                              |
|--------------------|----------------------------------------------------------------------------------------------------------------------------------------------|
| <b>Table S1</b>    | Correlative bond distances (Å) and angles (°) of <b>1</b> and <b>2</b> .                                                                     |
| <b>Table S2</b>    | Major peaks distributed in the ESI-MS of <b>1</b> and <b>2</b> in positive mode.                                                             |
| <b>Table S3</b>    | Selected parameters from the fitting results of the Cole-Cole plots for <b>1</b> and <b>2</b> under 1000 Oe field.                           |
| Supporting Figures |                                                                                                                                              |
| <b>Figure S1</b>   | ESI-MS peaks of dissolved crystals of <b>1</b> and <b>2</b> in methanol.                                                                     |
| <b>Figure S2</b>   | The overlapped calculative and experimental spectra of some peaks for <b>1</b> (In-Source CID 0 eV).                                         |
| <b>Figure S3</b>   | The overlapped calculative and experimental spectra of some peaks for <b>2</b> (In-Source CID 0 eV).                                         |
| <b>Figure S4</b>   | The process of transformation from complex <b>1</b> to high nuclear peaks.                                                                   |
| <b>Figure S5</b>   | Alterable frequencies ac-susceptibilities ( $H_{dc} = 1000$ Oe) at the limit of temperatures for (a and b) <b>1</b> and (c and d) <b>2</b> . |

**Table S1.** Correlative bond distances (Å) and angles (°) of **1** and **2**.

| <b>1</b>   |             |             |           |            |           |
|------------|-------------|-------------|-----------|------------|-----------|
| Co3—O1     | 2.106 (6)   | Co1—O3      | 1.954 (6) | Co4—O5     | 1.923 (6) |
| Co3—O6     | 2.087 (6)   | Co1—O2      | 1.934 (6) | Co2—O1     | 2.099 (6) |
| Co3—O4     | 2.098 (6)   | Co1—N2      | 2.058 (7) | Co2—O6     | 2.098 (6) |
| Co3—O3     | 2.068 (7)   | Co4—Cl2     | 2.465 (6) | Co2—O2     | 2.072 (6) |
| Co3—N8     | 2.136 (7)   | Co4—O6      | 2.288 (6) | Co2—N10    | 2.129 (7) |
| Co3—N6     | 2.110 (6)   | Co4—O4      | 1.942 (6) | Co2—O5     | 2.085 (6) |
| Co1—Cl1    | 2.372 (4)   | Co4—N12     | 2.043 (7) | Co2—N4     | 2.123 (8) |
| Co1—O1     | 2.271 (6)   |             |           |            |           |
| O1—Co3—N8  | 96.3 (2)    | O2—Co1—O1   | 77.8 (2)  | O2—Co2—O1  | 79.0 (2)  |
| O1—Co3—N6  | 156.6 (3)   | O2—Co1—O3   | 121.7 (3) | O2—Co2—O6  | 104.2 (3) |
| O6—Co3—O1  | 79.3 (2)    | O2—Co1—N2   | 119.5 (3) | O2—Co2—N10 | 98.5 (3)  |
| O6—Co3—O4  | 80.4 (2)    | N2—Co1—Cl1  | 104.5 (2) | O2—Co2—O5  | 175.6 (3) |
| O6—Co3—N8  | 154.8 (2)   | N2—Co1—O1   | 77.1 (3)  | O2—Co2—N4  | 77.6 (3)  |
| O6—Co3—N6  | 97.5 (3)    | O6—Co4—Cl2  | 177.3 (2) | O5—Co2—O1  | 101.6 (3) |
| O4—Co3—O1  | 106.6 (2)   | O4—Co4—Cl2  | 99.0 (2)  | O5—Co2—O6  | 80.3 (2)  |
| O4—Co3—N8  | 77.1 (3)    | O4—Co4—O6   | 78.9 (2)  | O5—Co2—N10 | 77.1 (3)  |
| O4—Co3—N6  | 95.7 (3)    | O4—Co4—N12  | 120.4 (3) | O5—Co2—N4  | 102.5 (3) |
| O3—Co3—O1  | 80.4 (2)    | N12—Co4—Cl2 | 105.6 (3) | N4—Co2—N10 | 94.4 (3)  |
| O3—Co3—O6  | 99.6 (3)    | N12—Co4—O6  | 77.1 (3)  | Co3—O1—Co1 | 93.7 (2)  |
| O3—Co3—O4  | 172.8 (3)   | O5—Co4—Cl2  | 100.6 (2) | Co2—O1—Co3 | 100.4 (2) |
| O3—Co3—N8  | 104.1 (3)   | O5—Co4—O6   | 79.1 (2)  | Co2—O1—Co1 | 93.5 (2)  |
| O3—Co3—N6  | 77.2 (3)    | O5—Co4—O4   | 120.3 (3) | Co3—O6—Co4 | 93.2 (2)  |
| N6—Co3—N8  | 95.9 (3)    | O5—Co4—N12  | 107.3 (3) | Co3—O6—Co2 | 101.1 (2) |
| O1—Co1—Cl1 | 177.78 (19) | O1—Co2—N10  | 99.3 (3)  | Co2—O6—Co4 | 93.5 (2)  |
| O3—Co1—Cl1 | 99.1 (2)    | O1—Co2—N4   | 154.4 (3) | Co4—O4—Co3 | 103.9 (3) |
| O3—Co1—O1  | 78.9 (2)    | O6—Co2—O1   | 79.2 (2)  | Co1—O3—Co3 | 105.1 (3) |
| O3—Co1—N2  | 105.9 (3)   | O6—Co2—N10  | 156.5 (3) | Co1—O2—Co2 | 105.3 (3) |
| O2—Co1—Cl1 | 102.5 (2)   | O6—Co2—N4   | 96.5 (3)  | Co4—O5—Co2 | 105.8 (3) |
| <b>2</b>   |             |             |           |            |           |

|                                      |           |                         |             |                          |           |
|--------------------------------------|-----------|-------------------------|-------------|--------------------------|-----------|
| Br1—Co2                              | 2.515 (2) | Co1—O3 <sup>i</sup>     | 2.054 (9)   | Co2—N2                   | 2.025 (9) |
| Co1—O1                               | 2.080 (7) | Co1—O2                  | 2.123 (9)   | Co2—O3                   | 1.935 (8) |
| Co1—O1 <sup>i</sup>                  | 2.119 (7) | Co1—N4                  | 2.097 (9)   | Co2—O2                   | 1.954 (9) |
| Co1—N6 <sup>i</sup>                  | 2.100 (9) | Co2—O1                  | 2.278 (8)   | O1—Co1 <sup>i</sup>      | 2.119 (7) |
| N6—Co1 <sup>i</sup>                  | 2.100 (9) | O3—Co1 <sup>i</sup>     | 2.054 (9)   |                          |           |
| O1—Co1—O1 <sup>i</sup>               | 79.1 (3)  | O3 <sup>i</sup> —Co1—O2 | 175.7 (3)   | O3—Co2—N2                | 117.7 (4) |
| O1—Co1—N6 <sup>i</sup>               | 94.5 (3)  | O3 <sup>i</sup> —Co1—N4 | 98.9 (4)    | O3—Co2—O2                | 119.4 (4) |
| O1—Co1—O2                            | 80.1 (3)  | N4—Co1—O1 <sup>i</sup>  | 96.1 (3)    | O2—Co2—Br1               | 98.9 (3)  |
| O1 <sup>i</sup> —Co1—O2              | 100.5 (3) | N4—Co1—N6 <sup>i</sup>  | 99.1 (4)    | O2—Co2—O1                | 79.0 (3)  |
| O1—Co1—N4                            | 155.2 (4) | N4—Co1—O2               | 76.9 (4)    | O2—Co2—N2                | 111.9 (4) |
| N6 <sup>i</sup> —Co1—O1 <sup>i</sup> | 155.3 (4) | O1—Co2—Br1              | 177.39 (19) | Co1—O1—Co1 <sup>i</sup>  | 100.9 (3) |
| N6 <sup>i</sup> —Co1—O2              | 101.9 (4) | N2—Co2—Br1              | 103.9 (3)   | Co1—O1—Co2               | 95.0 (3)  |
| O3 <sup>i</sup> —Co1—O1 <sup>i</sup> | 80.4 (3)  | N2—Co2—O1               | 78.4 (3)    | Co1 <sup>i</sup> —O1—Co2 | 92.5 (3)  |
| O3 <sup>i</sup> —Co1—O1              | 104.2 (3) | O3—Co2—Br1              | 100.8 (3)   | Co2—O3—Co1 <sup>i</sup>  | 105.6 (4) |
| O3 <sup>i</sup> —Co1—N6 <sup>i</sup> | 78.1 (4)  | O3—Co2—O1               | 79.0 (3)    | Co2—O2—Co1               | 104.1 (3) |

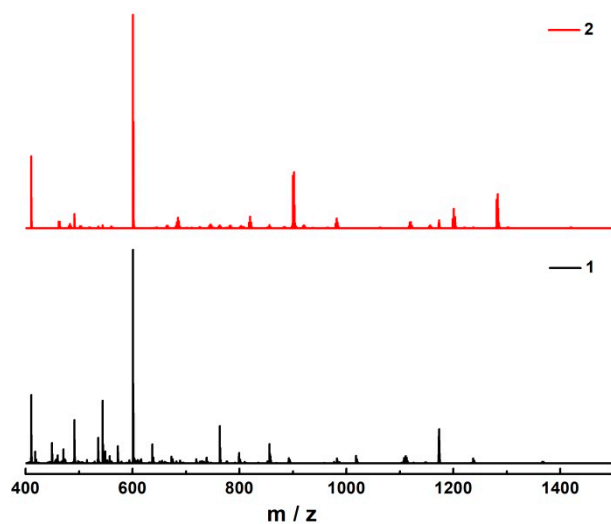

**Figure S1.** ESI-MS peaks of dissolved crystals of **1** and **2** in methanol.

**Table S2.** Major peaks distributed in the ESI-MS of **1** and **2** in positive mode.

| <b>1</b>                                           |                    |                 |                  |
|----------------------------------------------------|--------------------|-----------------|------------------|
| Peaks                                              | Relative Intensity | Obs. <i>m/z</i> | Calc. <i>m/z</i> |
| [Co <sub>3</sub> (L) <sub>4</sub> ] <sup>2+</sup>  | 0.499              | 410.55          | 410.54           |
| [HCo <sub>3</sub> (L) <sub>5</sub> ] <sup>2+</sup> | 0.316              | 491.58          | 491.58           |

|                                                          |                    |                 |                  |
|----------------------------------------------------------|--------------------|-----------------|------------------|
| $[\text{Co}_4(\text{L})_5(\text{CH}_3\text{O})]^{2+}$    | 0.187              | 536.05          | 536.06           |
| $[\text{H}_2\text{Co}(\text{L})_3]^+$                    | 0.457              | 544.16          | 544.16           |
| $[\text{H}_2\text{Co}_3(\text{L})_6]^{2+}$               | 0.125              | 572.62          | 572.62           |
| $[\text{Co}_4(\text{L})_6]^{2+}$                         | 1                  | 601.08          | 601.08           |
| $[\text{HCo}_2(\text{L})_3\text{Cl}]^+$                  | 0.090              | 637.06          | 637.06           |
| $[\text{HCo}_2(\text{L})_4]^+$                           | 0.175              | 763.16          | 763.16           |
| $[\text{H}_2\text{Co}_2(\text{L})_4\text{Cl}]^+$         | 0.049              | 799.14          | 799.14           |
| $[\text{Co}_3(\text{L})_4\text{Cl}]^+$                   | 0.091              | 856.05          | 856.05           |
| $[\text{HCo}_3(\text{L})_4\text{Cl}_2]^+$                | 0.025              | 892.03          | 892.03           |
| $[\text{HCo}_3(\text{L})_5\text{Cl}]^+$                  | 0.036              | 1018.13         | 1018.13          |
| $[\text{Co}_7(\text{L})_{11}(\text{CH}_3\text{O})]^{2+}$ | 0.035              | 1108.17         | 1108.17          |
| $[\text{Co}_4(\text{L})_5\text{Cl}_2]^+$                 | 0.026              | 1111.03         | 1111.03          |
| $[\text{Co}_7(\text{L})_{12}]^{2+}$                      | 0.161              | 1173.19         | 1173.20          |
| $[\text{Co}_4(\text{L})_6\text{Cl}]^+$                   | 0.024              | 1237.13         | 1237.13          |
| <b>2</b>                                                 |                    |                 |                  |
| Peaks                                                    | Relative Intensity | Obs. <i>m/z</i> | Calc. <i>m/z</i> |
| $[\text{Co}_3(\text{L})_4]^{2+}$                         | 0.338              | 410.54          | 410.55           |
| $[\text{HCo}_3(\text{L})_5]^{2+}$                        | 0.068              | 491.58          | 491.58           |
| $[\text{Co}_4(\text{L})_6]^{2+}$                         | 1                  | 601.08          | 601.08           |
| $[\text{Co}_3(\text{L})_4\text{Br}]^+$                   | 0.248              | 900.01          | 900.00           |
| $[\text{Co}_7(\text{L})_{12}]^{2+}$                      | 0.118              | 1173.19         | 1173.20          |
| $[\text{Co}_4(\text{L})_6\text{Br}]^+$                   | 0.160              | 1283.06         | 1283.08          |

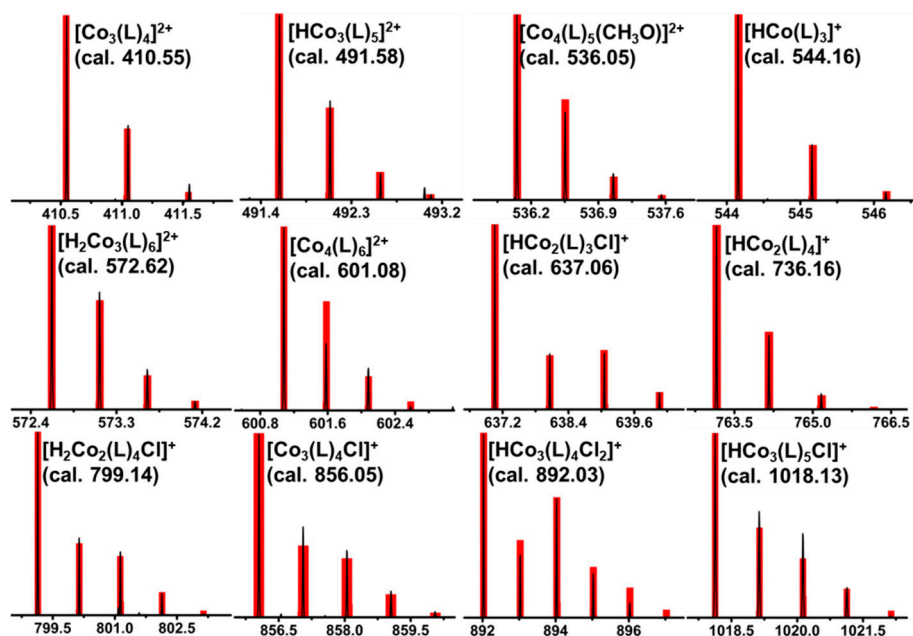

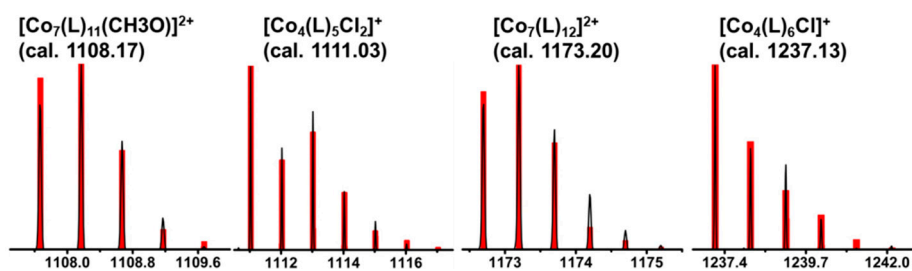

**Figure S2.** The overlapped calculative and experimental spectra of some peaks for 1.

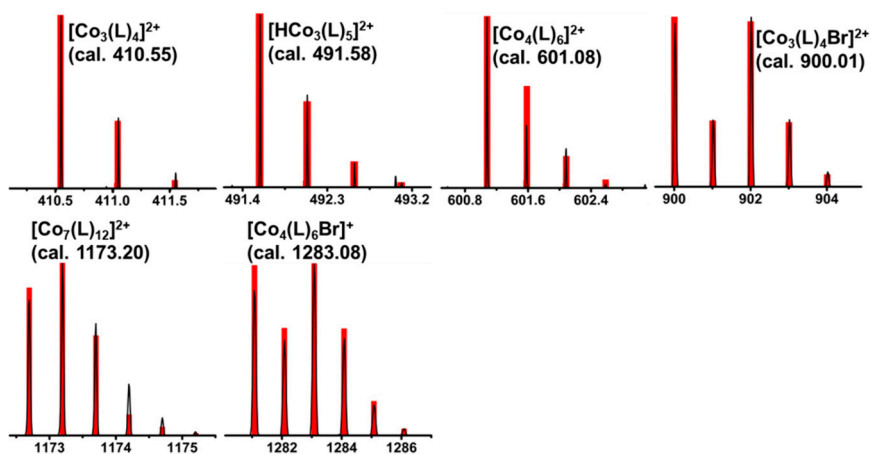

**Figure S3.** The overlapped calculative and experimental spectra of some peaks for 2.

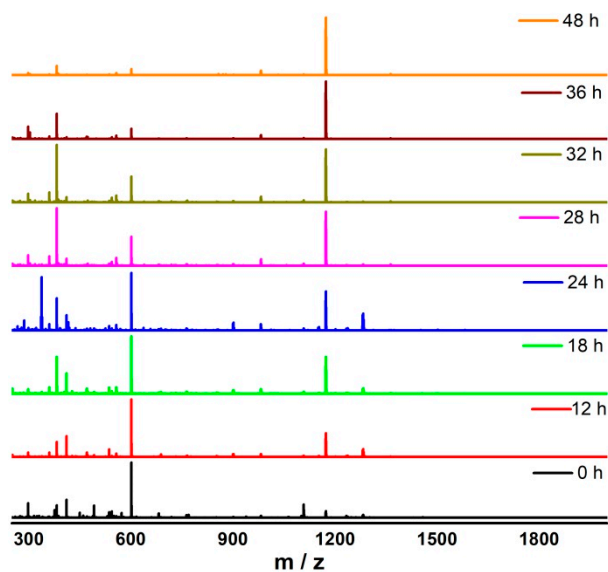

**Figure S4.** The process of transformation from complex 1 to high nuclear peaks.

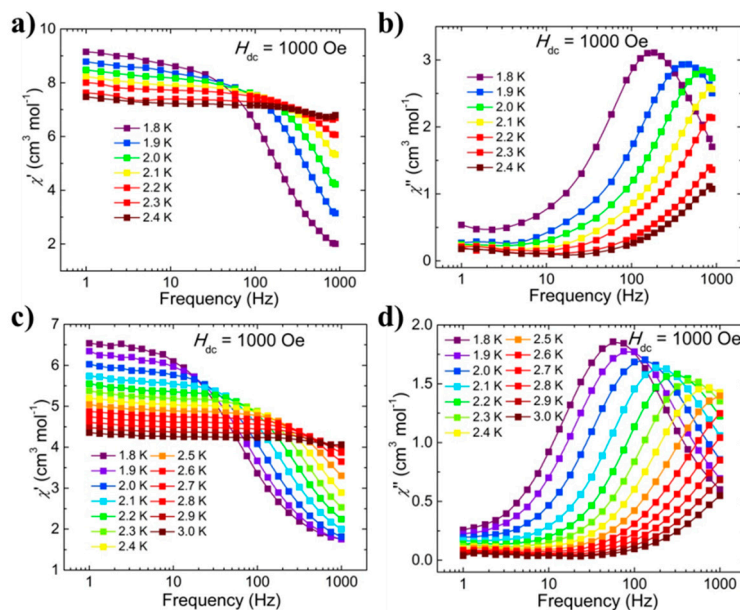

**Figure S5.** Alterable frequencies ac-susceptibilities ( $H_{dc} = 1000$  Oe) at the limit of temperatures for (a and b) **1** and (c and d) **2**.

**Table S3.** Selected parameters from the fitting results of the Cole-Cole plots for **1** and **2** under 1000 Oe field.

| <i>Temp.</i> (K) | <b>1</b> |          |          | <b>2</b> |          |          |
|------------------|----------|----------|----------|----------|----------|----------|
|                  | $\tau$   | $\alpha$ | residual | $\tau$   | $\alpha$ | residual |
| 1.8              | 8.70E-04 | 0.166    | 1.27E-01 | 2.49E-03 | 0.206    | 3.87E-02 |
| 1.9              | 5.85E-04 | 0.168    | 1.31E-01 | 1.80E-03 | 0.205    | 3.90E-02 |
| 2.0              | 3.53E-04 | 0.179    | 1.26E-01 | 1.17E-03 | 0.195    | 5.78E-02 |
| 2.1              | 1.88E-04 | 0.208    | 9.88E-02 | 7.19E-04 | 0.172    | 6.94E-02 |
| 2.2              | 1.02E-04 | 0.222    | 4.85E-02 | 4.78E-04 | 0.153    | 6.59E-02 |
| 2.3              | 6.44E-05 | 0.233    | 7.73E-02 | 3.31E-04 | 0.143    | 5.65E-02 |
| 2.4              | 4.51E-05 | 0.232    | 9.17E-02 | 2.22E-04 | 0.147    | 4.92E-02 |
| 2.5              | 3.13E-05 | 0.228    | 1.12E-01 | 1.40E-04 | 0.164    | 4.07E-02 |
| 2.6              | 2.30E-05 | 0.217    | 9.88E-02 | 8.34E-05 | 0.194    | 3.36E-02 |
